# Supplementary material
Source: PubMed Central journal article supplement (PMC7213482)
Supplement: JSLHR-63-206-s001.pdf [file JSLHR-63-206-s001.pdf]

**Supplemental Material S1.** Comparison between participants with < 50 versus  $\geq$  50 utterances.

| Variable                                                                  | Preterm                             |                                          | Term                                |                                          |
|---------------------------------------------------------------------------|-------------------------------------|------------------------------------------|-------------------------------------|------------------------------------------|
|                                                                           | < 50<br>utterances<br><i>n</i> = 10 | $\geq$ 50<br>utterances<br><i>n</i> = 87 | < 50<br>utterances<br><i>n</i> = 21 | $\geq$ 50<br>utterances<br><i>n</i> = 80 |
| Gestational age at birth (weeks), mean ( <i>SD</i> )                      | 28.77 (1.16)                        | 27.86 (1.41)                             | 39.95 (1.45)                        | 40.06 (1.14)                             |
| Male sex, <i>n</i> (%)                                                    | 6 (60%)                             | 45 (52%)                                 | 8 (38%)                             | 42 (53%)                                 |
| Multiple birth, <i>n</i> (%)                                              | 1 (10%)                             | 38 (44%)                                 | 0 (0%)                              | 2 (3%)                                   |
| High social risk, <i>n</i> (%)                                            | 3 (33%)                             | 32 (40%)                                 | 5 (30%)                             | 18 (25%)                                 |
| Multilingual, <i>n</i> (%)                                                | 4 (40%)                             | 9 (10%)                                  | 2 (10%)                             | 10 (13%)                                 |
| Diagnosis of neurodevelopmental disorder, <i>n</i> (%)                    | 1 (10%)                             | 4 (5%)                                   | 1 (5%)                              | 1 (1%)                                   |
| Receiving speech/language therapy at the time of assessment, <i>n</i> (%) | 2 (20%)                             | 16 (18%)                                 | 0 (0%)                              | 1 (1%)                                   |
| Corrected age (years) at assessment, mean ( <i>SD</i> )                   | 3.19 (0.16)                         | 3.20 (0.19)                              | 3.09 (0.11)                         | 3.20 (0.21)                              |
| Completed full PLS-5                                                      | 7 (70%)                             | 78 (90%)                                 | 17 (81%)                            | 77 (96%)                                 |
| PLS-5 Auditory Comprehension scale, mean ( <i>SD</i> )                    | 94.88 (16.08)                       | 97.49 (14.40)                            | 103.39 (9.73)                       | 101.44 (10.36)                           |
| PLS-5 Expressive Communication scale, mean ( <i>SD</i> )                  | 94.86 (13.67)                       | 99.12 (9.72)                             | 107.44 (8.62)                       | 104.73 (10.59)                           |
| PLS-5 Total Language scale, mean ( <i>SD</i> )                            | 94.43 (15.94)                       | 98.47 (11.49)                            | 106.50 (9.10)                       | 103.36 (10.41)                           |

*Note.* *SD* = standard deviation; PLS-5 = Preschool Language Scales–Fifth Edition (PLS-5), Australia and New Zealand adapted (Zimmerman, Steiner, & Pond, 2011).

**Reference**

Zimmerman, I., Steiner, V., & Pond, R. (2011). *Preschool Language Scales (Australian and New Zealand language adapted)–Fifth Edition*. San Antonio, TX: The Psychological Corporation.
