# Supplementary material
Source: PubMed Central journal article supplement (PMC7213482)
Supplement: JSLHR-63-206-s002.pdf [file JSLHR-63-206-s002.pdf]

## Supplemental Material S2. Interrater reliability.

| Variable                                        | Coefficient | 95% CI     | <i>p</i> |
|-------------------------------------------------|-------------|------------|----------|
| <i>Volubility and linguistic fluency</i>        |             |            |          |
| Number of utterances                            | 0.72        | 0.43, 0.88 | < .01    |
| Total number of completed words                 | 0.98        | 0.95, 0.99 | < .01    |
| Words per minute                                | 0.98        | 0.96, 0.99 | < .01    |
| Percent of intelligible and complete utterances | 0.58        | 0.21, 0.81 | < .01    |
| Maze words as a percentage of total words       | 0.83        | 0.62, 0.93 | < .01    |
| <i>Morphosyntactic complexity</i>               |             |            |          |
| Mean length of utterance in words               | 0.69        | 0.38, 0.86 | < .01    |
| Mean length of utterance in morphemes           | 0.66        | 0.33, 0.85 | < .01    |
| IPSyn total score                               | 0.77        | 0.46, 0.88 | < .01    |
| IPSyn noun phrase subscale                      | 0.86        | 0.66, 0.93 | < .01    |
| IPSyn verb phrase subscale                      | 0.71        | 0.31, 0.84 | < .01    |
| IPSyn question/negation subscale                | 0.78        | 0.48, 0.89 | < .01    |
| IPSyn sentence structures subscale              | 0.53        | 0.00, 0.74 | .04      |
| <i>Lexical variety</i>                          |             |            |          |
| Total number of words                           | 0.90        | 0.77, 0.96 | < .01    |
| Number of different word roots                  | 0.94        | 0.85, 0.98 | < .01    |
| Number of nouns                                 | 0.70        | 0.39, 0.87 | < .01    |
| Number of verbs                                 | 0.88        | 0.73, 0.95 | < .01    |
| Number of adjectives                            | 0.93        | 0.83, 0.97 | < .01    |
| Number of prepositions                          | 0.78        | 0.53, 0.91 | < .01    |

*Note.* CI = confidence interval; IPSyn = Index of Productive Syntax.
